# Supplementary material
Source: Elsevier journal article supplement (https://www.sciencedirect.com/science/article/pii/S2530016419302599)
Supplement: mmc1 [file S2530016419302599:mmc1.docx]

Ana María Gómez-Péreza,b, José Carlos Fernández-Garcíaa,b*, Pedro Iglesias-Lozanoc, Juan J. Díezc, Cristina Álvarez-Escolád, Beatriz Lecumberri-Santamaríad, Anna Lucas-Martíne, Sergio Donnayf, Carmen Cabrejasg, Edelmiro Menéndez-Torreh, Juan Carlos Galofréi, en representación del Área de Conocimiento de Tiroides de la SEEN.

1. Unidad de Gestión Clínica de Endocrinología y Nutrición. Hospital Universitario Virgen de la Victoria. Campus Universitario de Teatinos s/n, 29010, Málaga, España.
2. Laboratorio de Investigación. Instituto de Investigación Biomédica de Málaga (IBIMA). Hospital Universitario Virgen de la Victoria. Campus Universitario de Teatinos s/n, 29010, Málaga, España.
3. Servicio de Endocrinología y Nutrición. Hospital Universitario Puerta de Hierro Majadahonda, Universidad Autónoma de Madrid, Madrid, España.
4. Servicio de Endocrinología y Nutrición. Hospital Universitario La Paz. Madrid.
5. Servicio de Endocrinología y Nutrición. Hospital Universitari Germans Trias i Pujol. Badalona, España.
6. Servicio de Endocrinología y Nutrición. Hospital Fundacion Hospital Alcorcon, Madrid, España
7. Servicio de Endocrinología y Nutrición. Hospital Lozano Blesa, Zaragoza, España.
8. Servicio de Endocrinología y Nutrición. Hospital Universitario Central de Asturias, Oviedo, España.
9. Servicio de Endocrinología y Nutrición. Clínica Universidad de Navarra. Pamplona, España.

**Email de los autores**

- Ana María Gómez-Pérez: [anamgp86@gmail.com](mailto:anamgp86@gmail.com)

- José Carlos Fernández-García: [josecarlosfdezgarcia@hotmail.com](mailto:josecarlosfdezgarcia@hotmail.com)

- Pedro Iglesias Lozano: [piglo65@gmail.com](mailto:piglo65@gmail.com)

- Juan José Díez: [juanjose.diez@salud.madrid.org](mailto:juanjose.diez@salud.madrid.org)

- Cristina Álvarez-Escolá: [calvareze@salud.madrid.org](mailto:calvareze@salud.madrid.org)

- Beatriz Lecumberri Santamaría: [lecum74@hotmail.com](mailto:lecum74@hotmail.com)

- Anna Lucas Martín: [alucas.germanstrias@gencat.cat](mailto:alucas.germanstrias@gencat.cat)

- Sergio Donnay: [sdonnay@fhalcorcon.es](mailto:sdonnay@fhalcorcon.es)

- Carmen Cabrejas: [carmenmallen2000@yahoo.es](mailto:carmenmallen2000@yahoo.es)

- Edelmiro Menéndez Torre: [edelangot@gmail.com](mailto:edelangot@gmail.com)

- Juan Carlos Galofré: [jcgalofre@unav.es](mailto:jcgalofre@unav.es)

***Autor de correspondencia**

- D. José Carlos Fernández-García, Unidad de Gestión Clínica de Endocrinología y Nutrición. Hospital Universitario Virgen de la Victoria. Campus Universitario de Teatinos s/n, 29010, Málaga, España. Email: [josecarlosfdezgarcia@hotmail.com](mailto:josecarlosfdezgarcia@hotmail.com) Tel: +34 951034016; Fax: +34 951924651.

**Conflicto de intereses**: Los autores declaran no tener ningún conflicto de intereses en relación a este documento.

**Financiación:** Ana María Gómez Pérez es receptora de un contrato de refuerzo a la actividad investigadora del Servicio Andaluz de Salud (SAS) (B-0033-2014); José Carlos Fernández-García es receptor de un contrato de investigador clínico del SAS (B-0003-2017).

**Agradecimientos:** A todas las personas que dedicaron su valioso tiempo contestando la encuesta.
